# Supplementary material for: Unique and outstanding cadmium sequestration by polystyrene-supported nanosized zirconium hydroxides: a case study
Source: Royal Society of Chemistry journal article supplement (doi:10.1039/c5ra09628f), 2015-01-01

## Supporting information

The unique and outstanding cadmium sequestration by polystyrene-supported nanosized zirconium hydroxides: a case study

Qingrui Zhang,<sup>a</sup> Teng Jie,<sup>a</sup> Zhaoxiang Zhang,<sup>a</sup> Guangze Nie,<sup>b\*</sup> Hongwei Zhao,<sup>a</sup> Qiuming Peng <sup>c</sup> and  
Tifeng Jiao,<sup>a\*</sup>

<sup>a</sup> Hebei Key Laboratory of Applied Chemistry, School of Environmental and Chemical Engineering, Yanshan University, Qinhuangdao 066004, PR China

<sup>b</sup> School of the Environment, Xianlin Campus, Nanjing University, Nanjing 210023, PR China

<sup>c</sup> State Key Laboratory of Metastable Materials Science and Technology, Yanshan University

**Table S1** The distribution ratio  $K_d$  (L/g) for three competing cations.

| Competing Cations | Adsorbent | $K_d$ (L/g) at different initial Me(II)/Cd(II) ratios in solution |     |      |      |       |       |
|-------------------|-----------|-------------------------------------------------------------------|-----|------|------|-------|-------|
|                   |           | 0                                                                 | 4   | 8    | 16   | 32    | 64    |
| Ca(II)            | HZO-PS    | 300                                                               | 295 | 36.1 | 12.1 | 4.58  | 1.55  |
|                   | PS        | 400                                                               | 351 | 145  | 2.23 | 0.327 | 0.137 |
| Mg(II)            | HZO-PS    | 300                                                               | 320 | 275  | 19.9 | 8.40  | 5.12  |
|                   | PS        | 400                                                               | 385 | 142  | 7.09 | 1.14  | 0.456 |
| Na(I)             | HZO-PS    | 300                                                               | 320 | 288  | 350  | 250   | 270   |
|                   | PS        | 400                                                               | 385 | 258  | 270  | 106   | 34.5  |

**Figure S1** The zeta potential of  $\text{Zr}(\text{OH})_4$  and the resulting HZO-PS

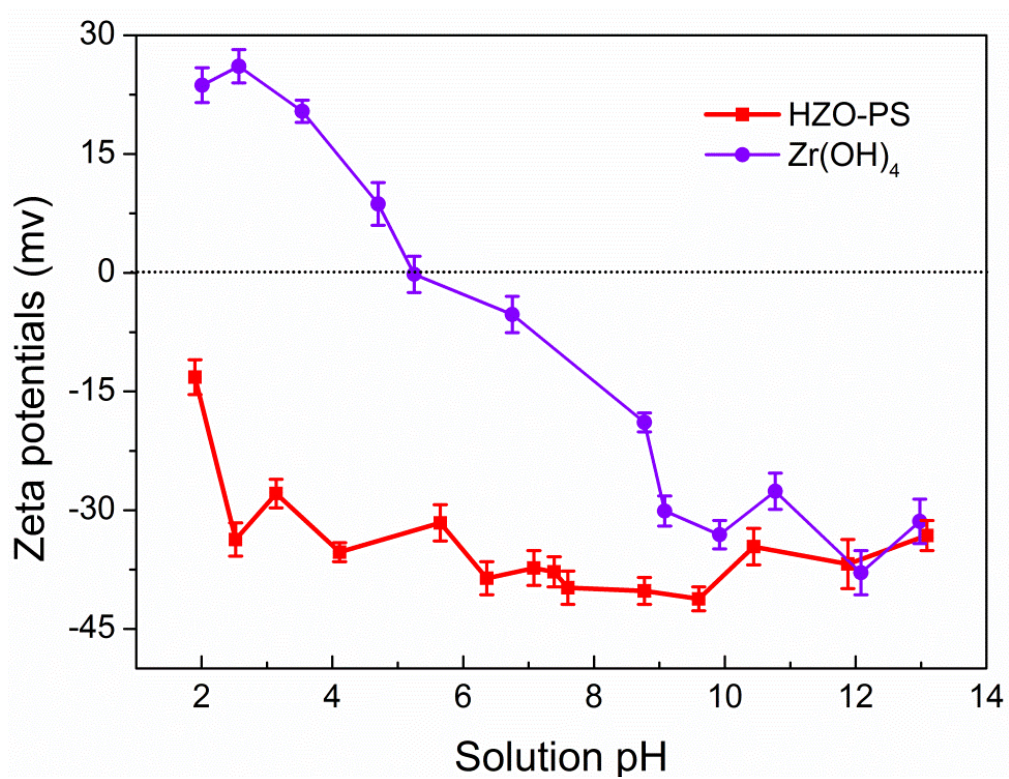

Supplement: c5ra09628f1.pdf [file c5ra09628f1.pdf]
